# Supplementary material for: Cryptic Diversity within the Major Trypanosomiasis Vector Glossina fuscipes Revealed by Molecular Markers
Source: PubMed Central journal article supplement (PMC3153427; doi:10.1371/journal.pntd.0001266), 2011-08-09

A

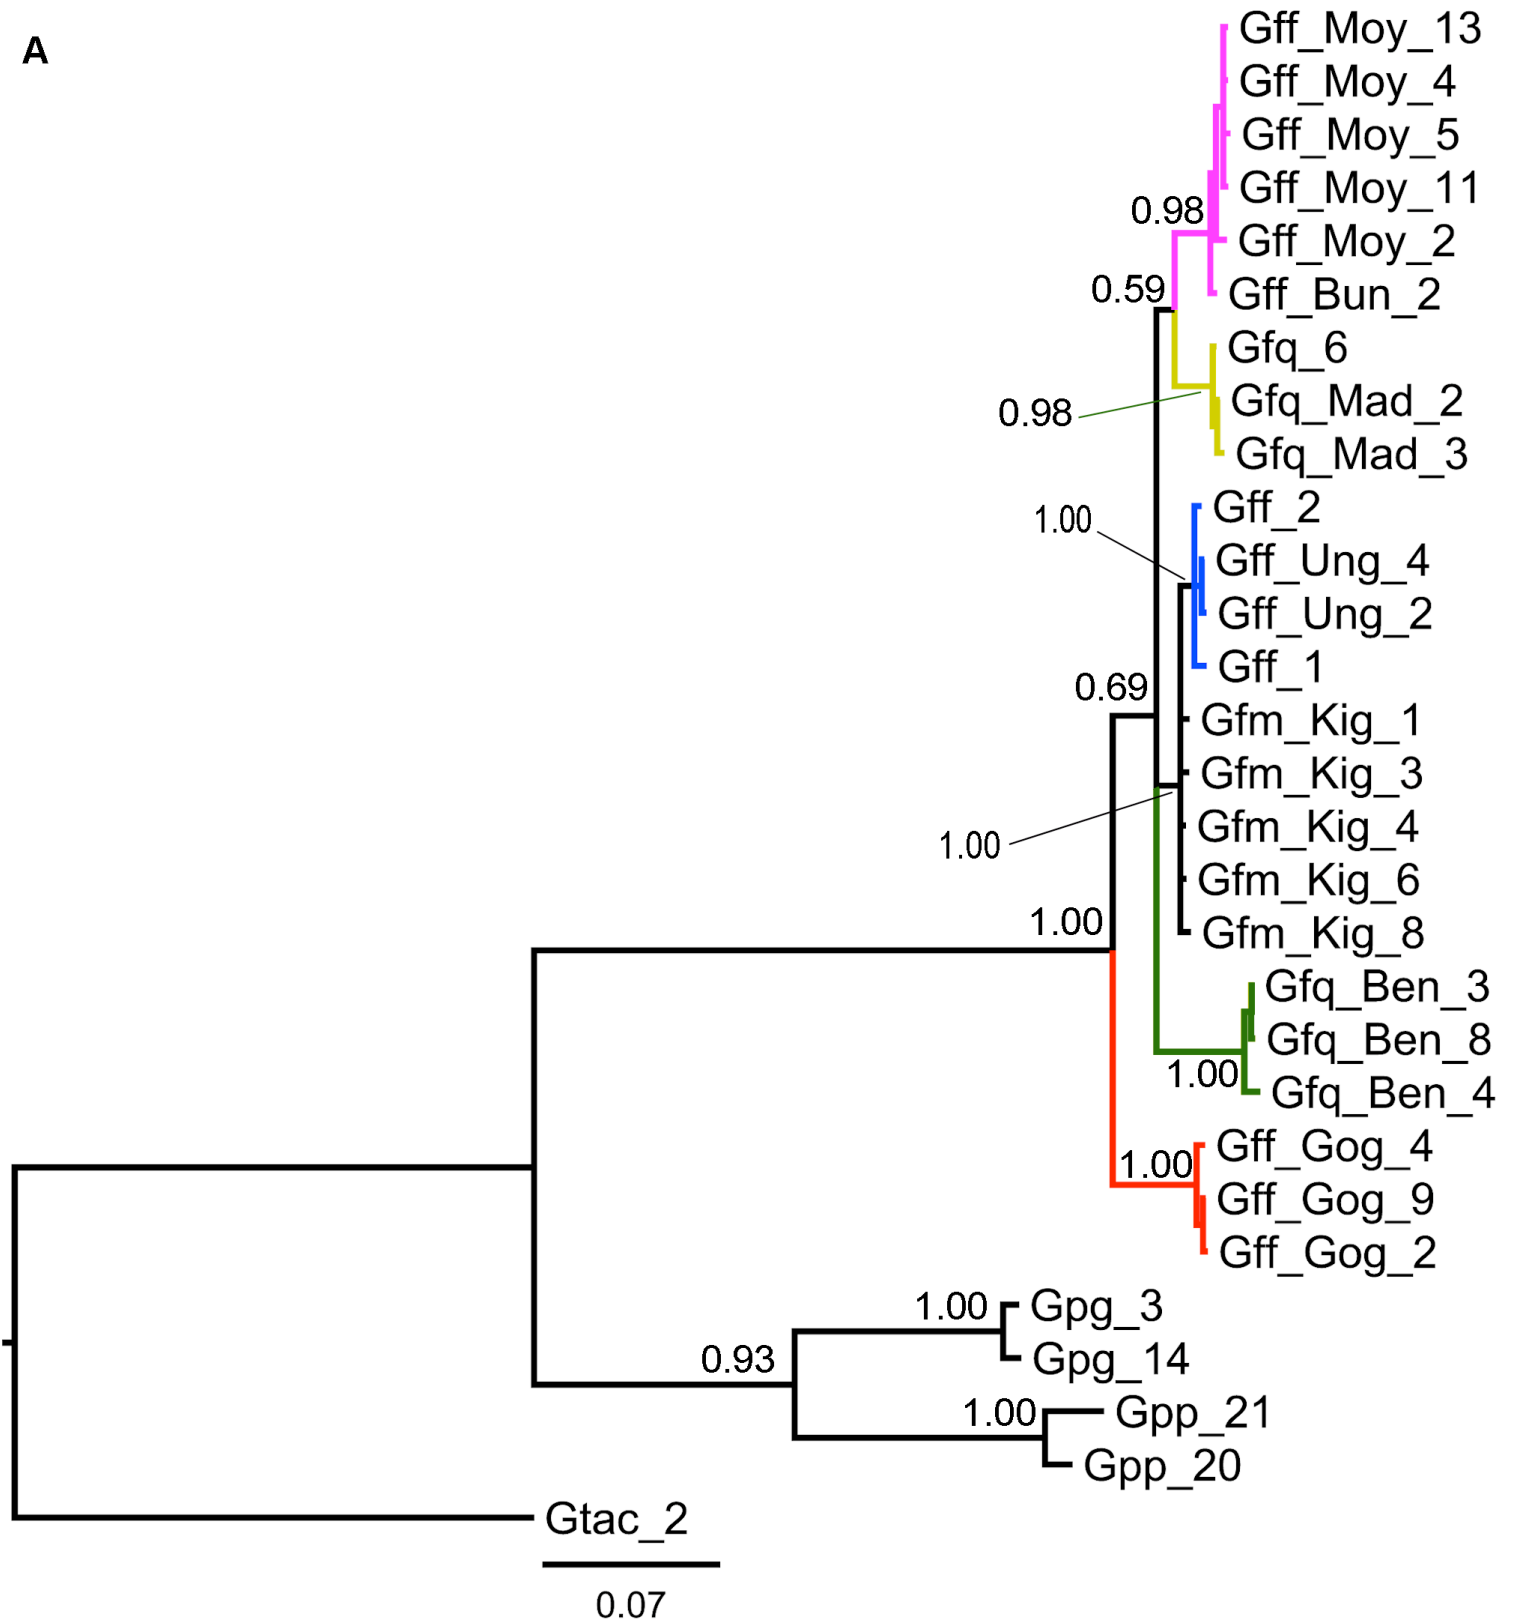

B

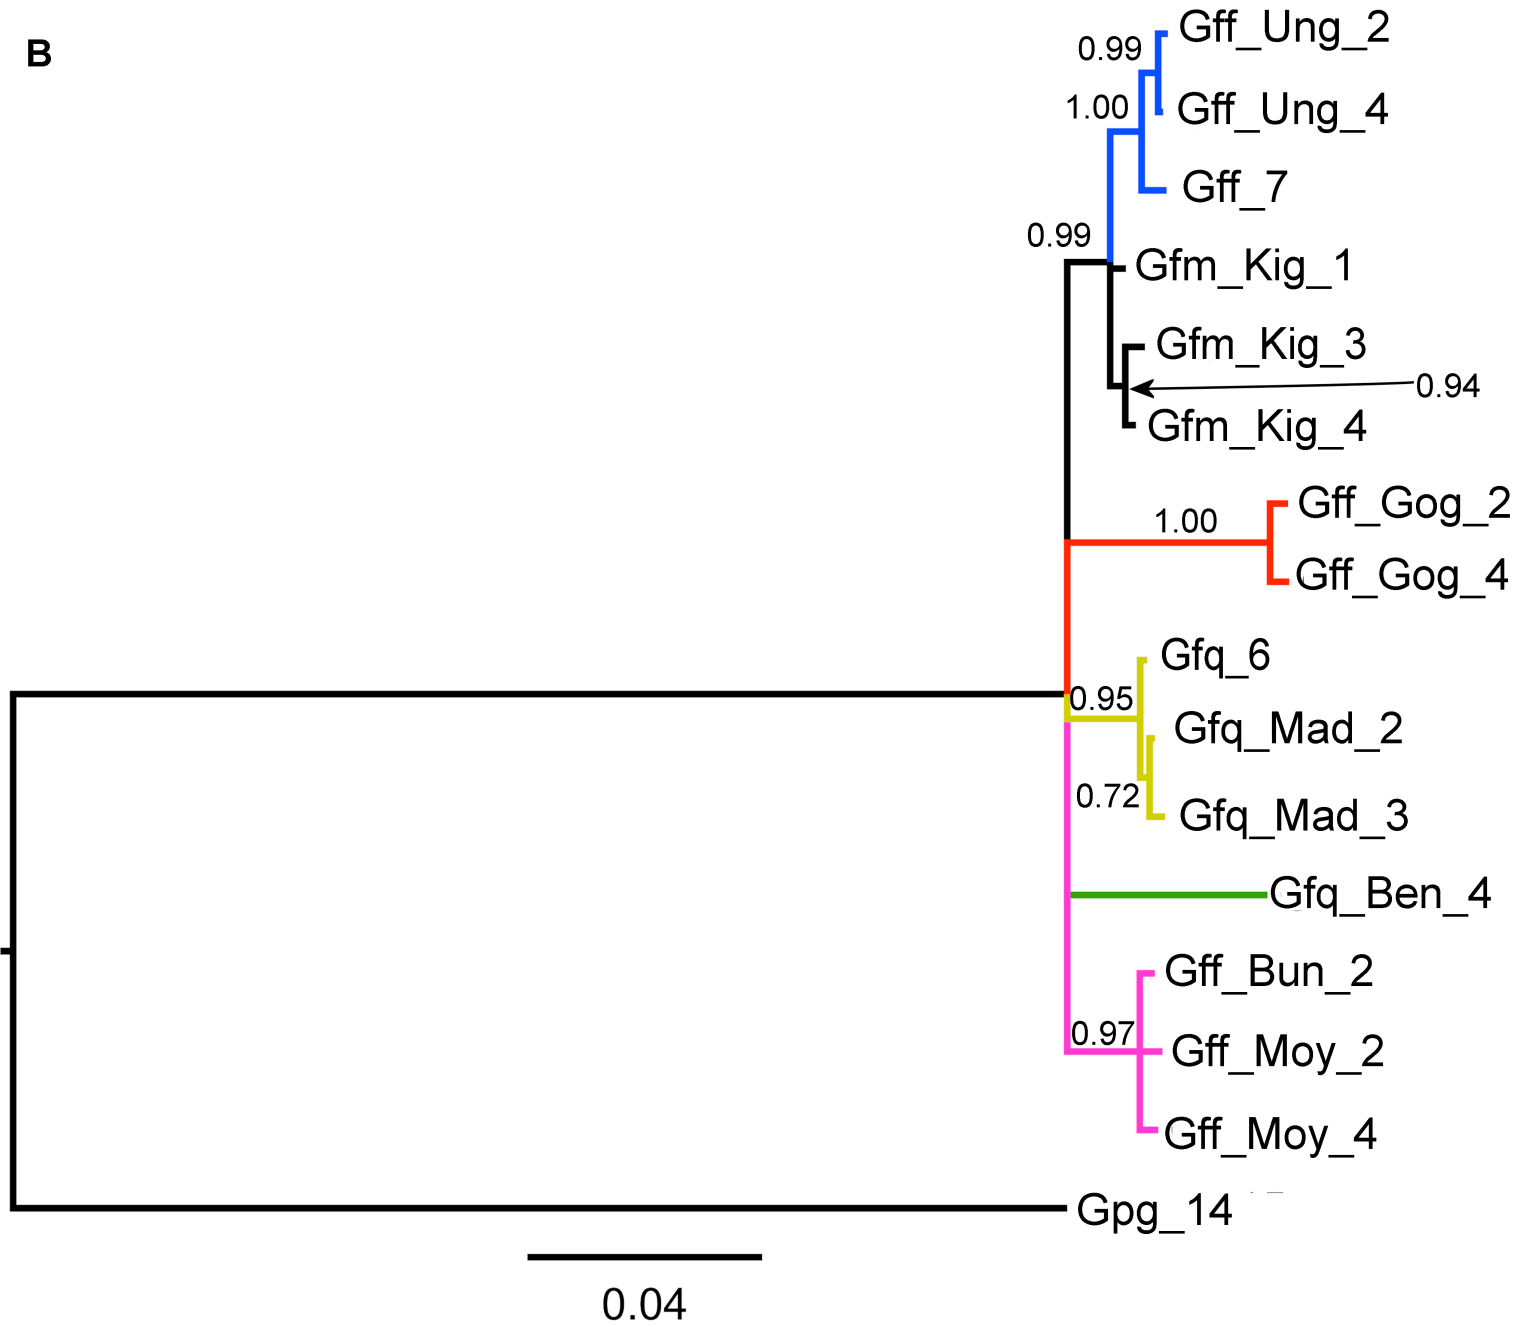

C

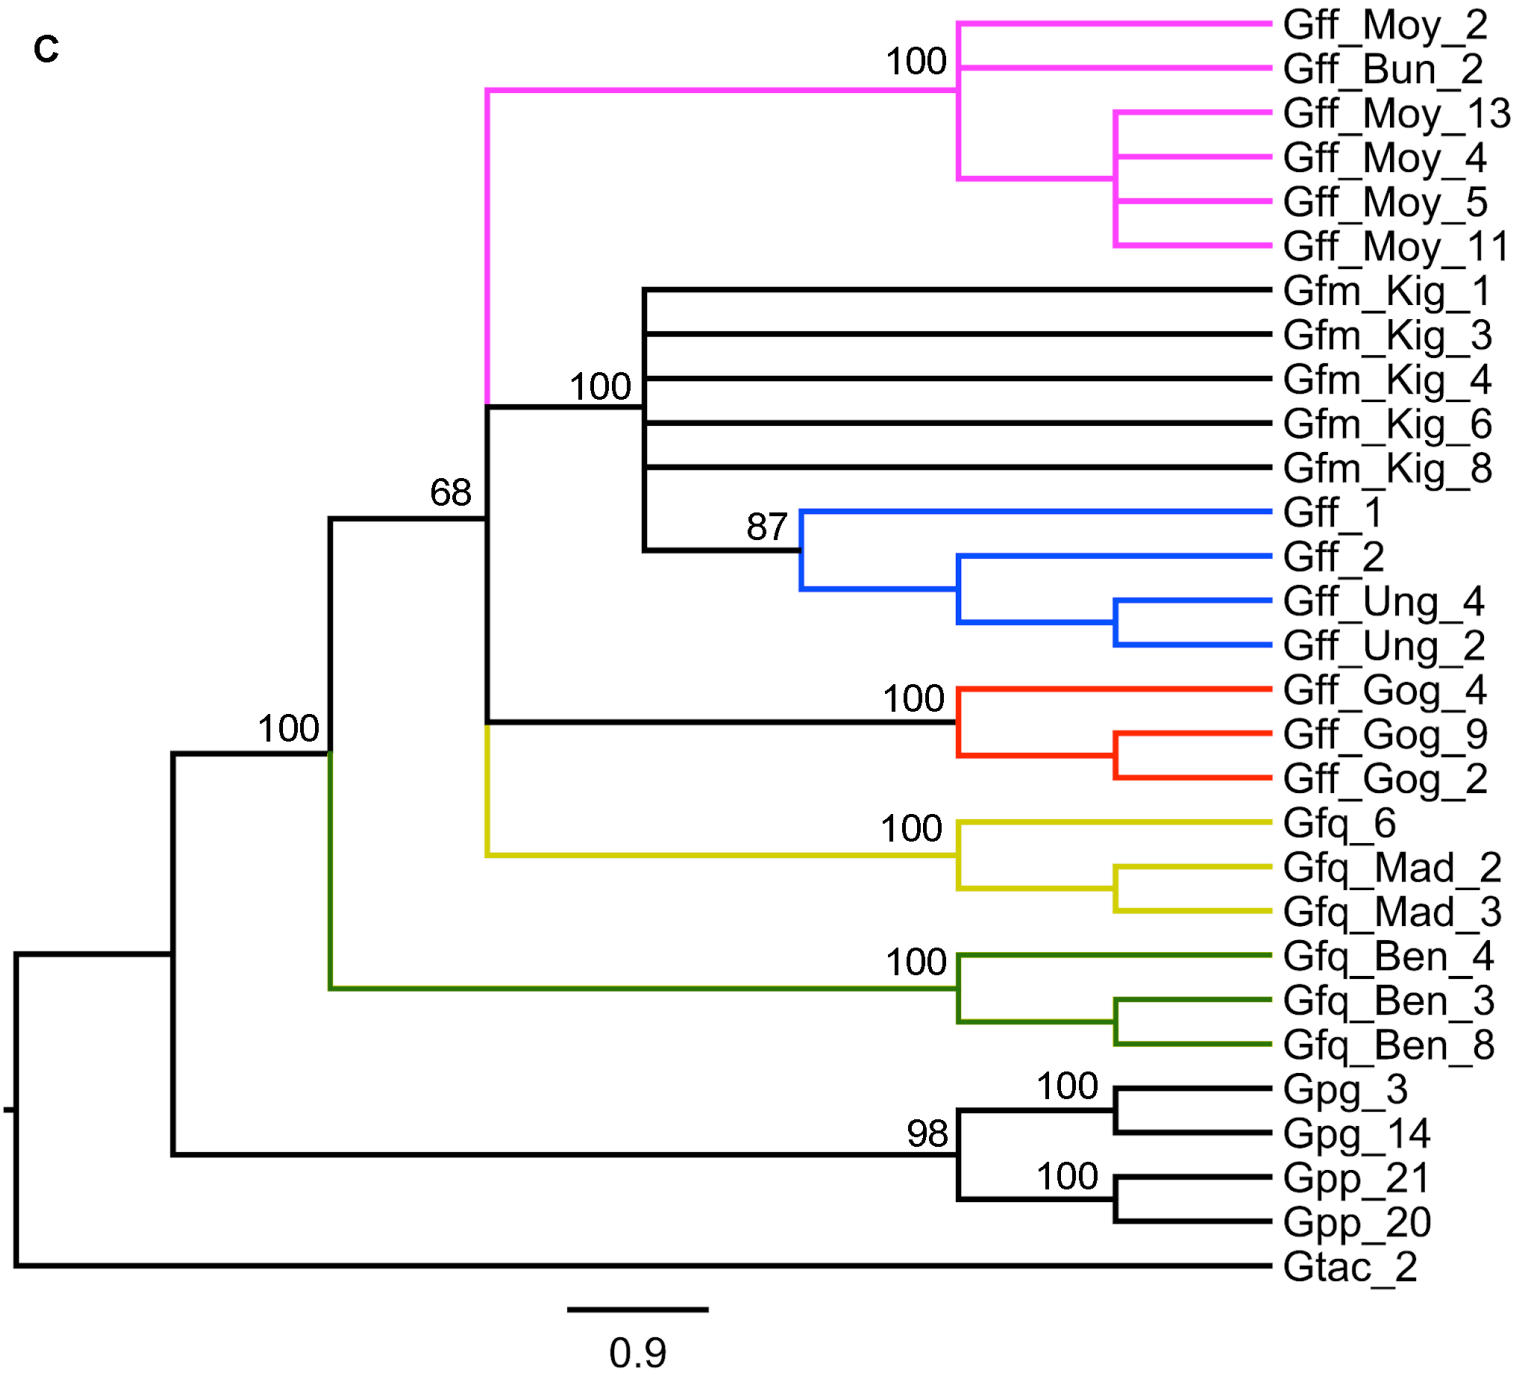

Supplement: pntd.0001266.s003.pdf [file pntd.0001266.s003.pdf]
